# Supplementary material
Source: PubMed Central journal article supplement (PMC5466026)
Supplement: supp_tpc.16.00863_TPC2016-00863-RAR2_Supplemental_Data.pdf [file supp_tpc.16.00863_TPC2016-00863-RAR2_Supplemental_Data.pdf]

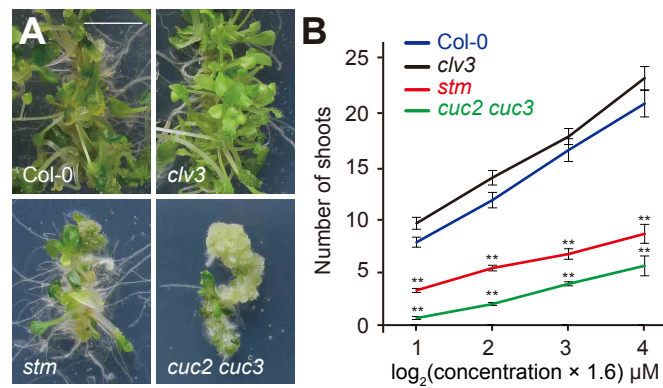

**Supplemental Figure 1. Shoot Regeneration in *clv3*, *stm* and *cuc2 cuc3*. (Supports Figure 1).**

The regenerative capacity in (A) was calculated as the number of shoots/total number of explants. Data are expressed as mean ± s.d..  $n=24$ ; p-value: Student's *t* test; \*\* $p < 0.01$ . Bar = 0.5 cm.

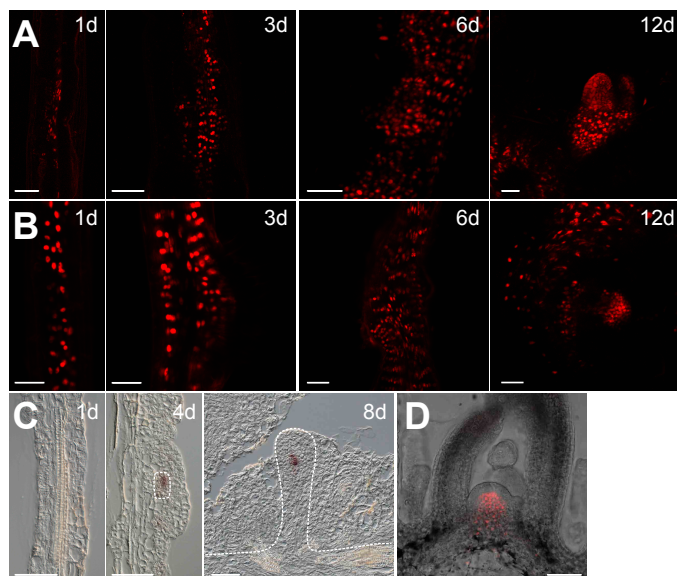

**Supplemental Figure 2. Comparison of the Expression Patterns of *WUS* Reporters. (Supports Figure 1).**

**(A) and (D)** The expression pattern of *ProWUS:dsRED-N7* (Gordon et al., 2007) reporter during shoot regeneration **(A)** and in the SAM **(D)**. The hypocotyls of *ProWUS:dsRED-N7* were used as explants. During shoot regeneration **(A)**,  $WUS^+$  cells (red) were visible after 1 day transfer to SIM and did not mark shoot progenitor cells. The difference between the mRNA accumulation pattern revealed by our *in situ* hybridization (Figures 1D to 1I) and protein localization revealed by live imaging analyses of Gordon's *ProWUS:dsRED-N7* reporter is not caused by the movement of DsRED because DsRED was fused to the N7 nuclear localization sequence. We speculate that the difference between our and Gordon's *WUS* reporter was due to the 35S promoter in the binary construct pPZP222 used by Gordon et al (Gordon et al., 2007). However, this reporter does mimic endogenous *WUS* expression pattern in the SAM **(D)**. Bar = 50 μm.

**(B)** The expression pattern of *ProWUS:dsRED-N7* (Gordon et al., 2007) reporter on SIM. The roots were used as explants. Bar = 50 μm.

**(C)** RNA *in situ* hybridization analyses. The roots of *ProWUS:dsRED-N7* were used as explants. Note when comparing **(B)** and **(C)**, it appears that *ProWUS:dsRED-N7* reporter does not mimic the *WUS* mRNA expression pattern. Bar = 50 μm.

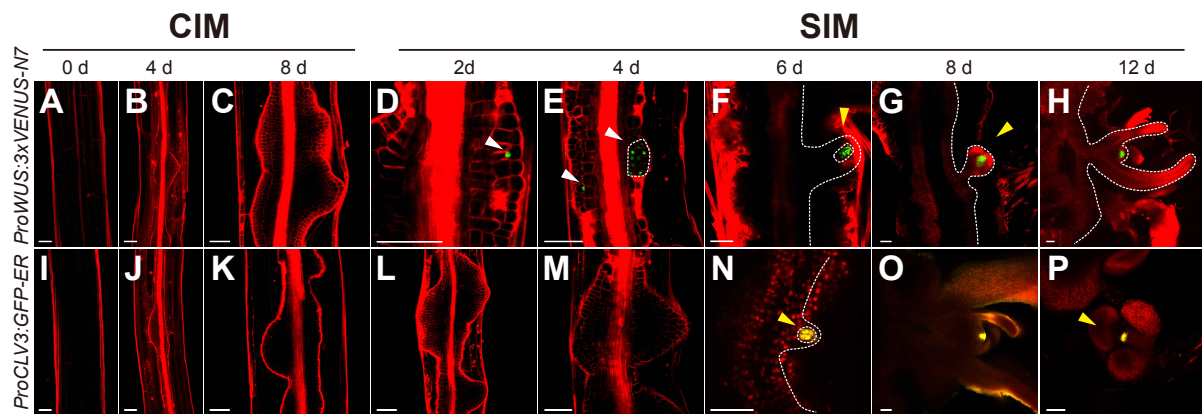

**Supplemental Figure 3. Dynamic Expression Patterns of *WUS* and *CLV3* during Shoot Regeneration. (Supports Figure 1).**

Hypocotyls from *ProWUS:3xVENUS-N7* (A) to (H) and *ProCLV3:GFP-ER* (I) to (P) were used for shoot regeneration. White and yellow arrows indicate *WUS*<sup>+</sup> cell and the developing SAM respectively. Cell outlines were stained by propidium iodide (PI, red). Bar = 50  $\mu$ m.

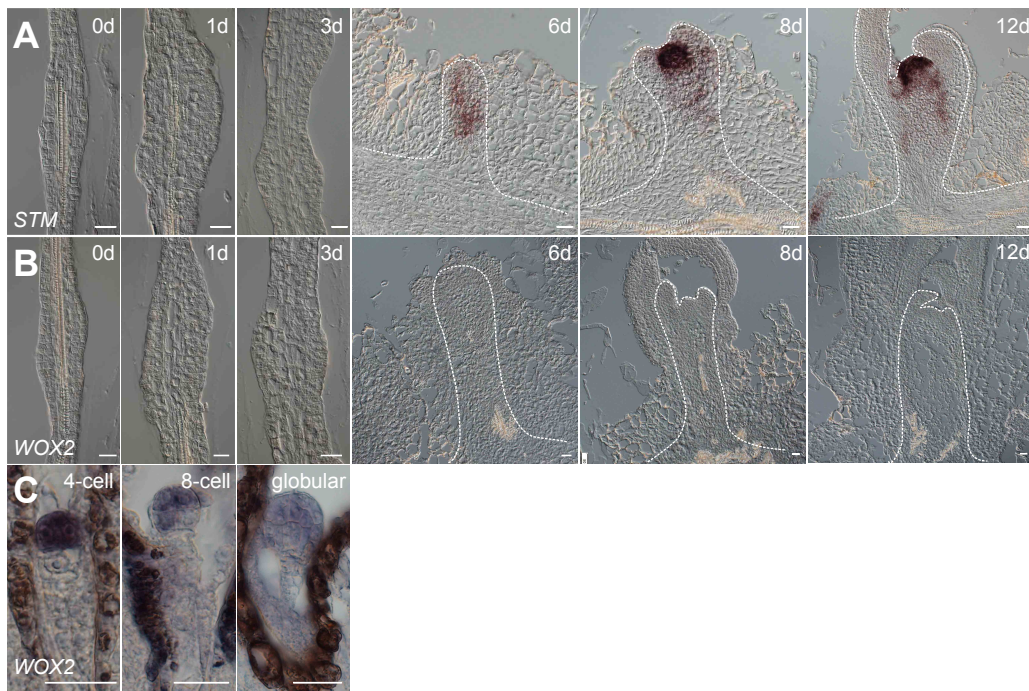

**Supplemental Figure 4. Expression Patterns of *STM* and *WOX2*. (Supports Figure 1).**

**(A)** Expression of *STM* is detectable beginning at stage III during shoot regeneration. Bar = 20 μm.  
**(B)** and **(C)** The transcripts of *WOX2* (blue) could be detected in the proembryo during embryogenesis **(C)** but not in calli during shoot *de novo* regeneration **(B)**. Bar = 20 μm.



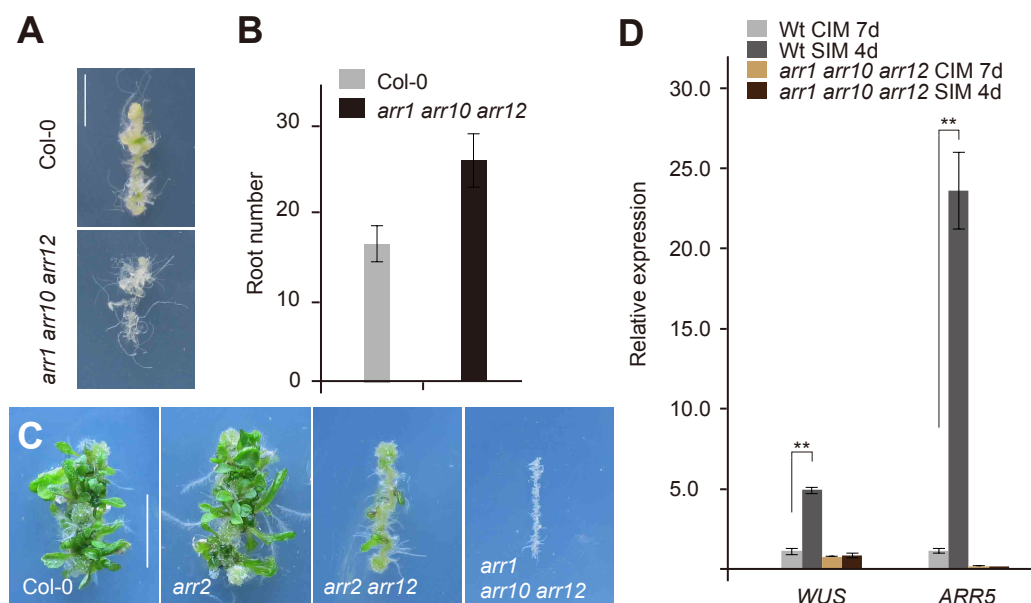

**Supplemental Figure 5. Regeneration Assay in the *arr* Mutant. (Supports Figure 2).**

(A) and (B) The hypocotyls of wild type and *arr1 arr10 arr12* mutant were used for the root regeneration assay. Note that the loss of function of *B-ARRs* did not affect root regenerative capacity. The regenerative capacity in (B) was calculated as the number of rooted explants/total number of explants. Data are expressed as mean  $\pm$  s.d..  $n=32$ ; Bar = 0.5 cm.

(C) Shoot regeneration of wild type (Col-0), *arr2*, *arr2 arr12* and *arr1 arr10 arr12*. While *arr2* and *arr12* single mutant regenerated shoots normally (Mason et al., 2005), *arr2 arr12* double mutant showed reduced shoot regenerative capacity. Bar = 0.5 cm.

(D) The expression level of *WUS* and *ARR5* in the wild-type and *arr1 arr10 arr12* explants. The expression of *WUS* and *ARR5* in wild type was normalized to that of *TUB*. Data are means  $\pm$  s.d..  $n=3$ . Student's *t* test; \*\* $p<0.01$ .

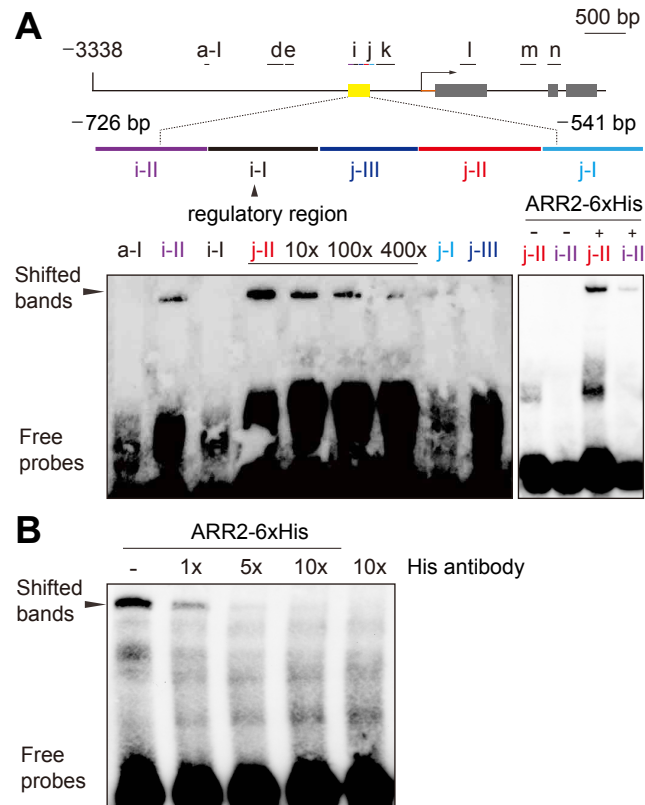

**Supplemental Figure 6. EMSA Assays. (Supports Figure 2).**

**(A)** EMSA assays. Competitive EMSA showing binding of ARR2 to two DNA fragments [-550 to -620 bp (j-II) and -700 to -760 bp (i-II)] of the *WUS* promoter (left panel). Relative amounts (labeled oligonucleotide was set to 1.0) of the un-labeled competitive oligonucleotide used in the reactions are indicated on the top. The positions of probes (a-l, i-l, i-II, j-l, j-II, j-III) are labeled with different colors. Shifted bands are indicated. The D5 region (-726 to -541 bp) and a 57-bp regulatory region (-712 to -655 bp, i-l) identified by Baurle and Laux are shown (Baurle and Laux, 2005). As a control, we performed the EMSA assays without (-) or with (+) ARR2 protein (right panel). Note that there is no shifted band for probe j-II and i-II in the absence of ARR2 protein.

**(B)** Supershift assays of j-II segment. The purified ARR2 proteins were mixed with different amounts of His antibody. The binding of His antibody with ARR2-6xHis proteins caused the decreased amounts of j-II shifted band.

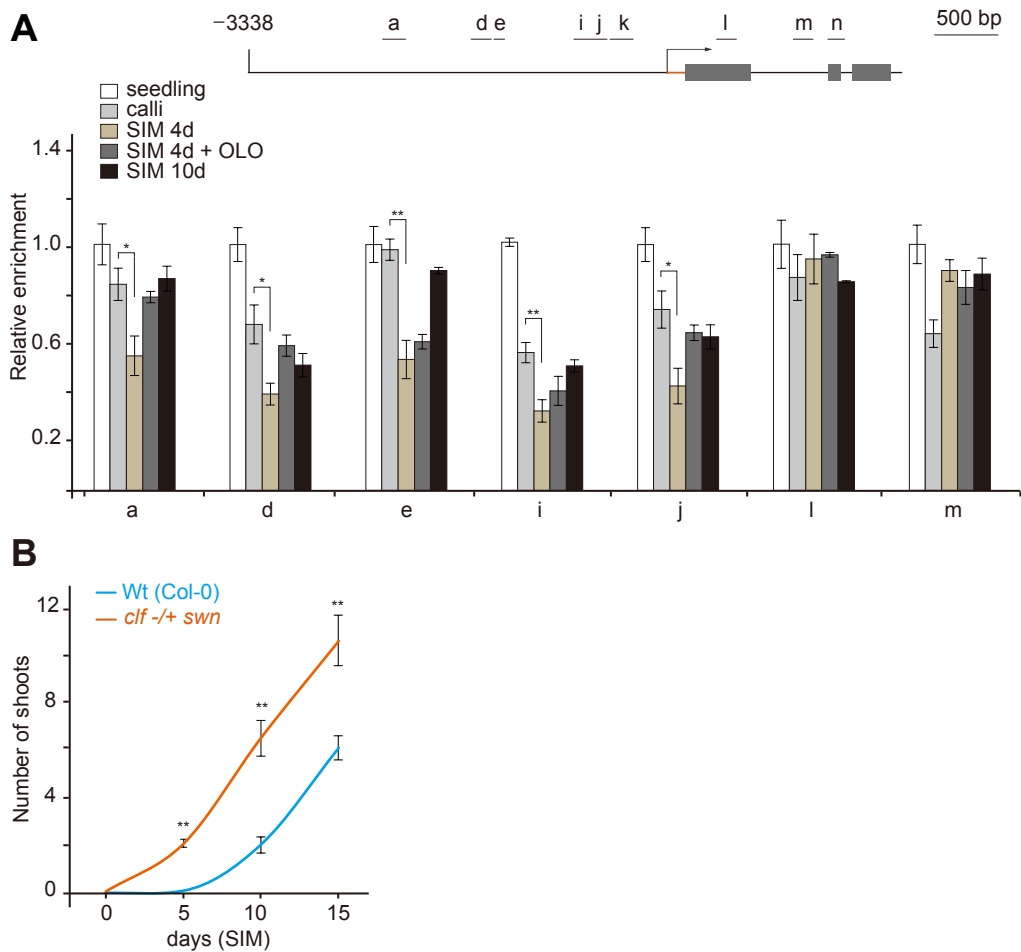

**Supplemental Figure 7. The Progressive Decrease in H3K27me3 Marks at the *WUS* Locus is Delayed by OLO Treatment. (Supports Figure 3).**

**(A)** ChIP analyses. Wild-type seedlings and explants cultured on SIM with or without OLO were used. Eight fragments (a to n) were analyzed. Error bars represent s.e.m. ( $n=3$  biological replicates); p-value: Student's  $t$  test; \* $p<0.05$ , \*\* $p<0.01$ .

**(B)** Shoot regeneration of the wild-type (Col-0) and *swn clf +/-* explants. Student's  $t$  test; \*\* $p<0.01$ ,  $n=18$ .

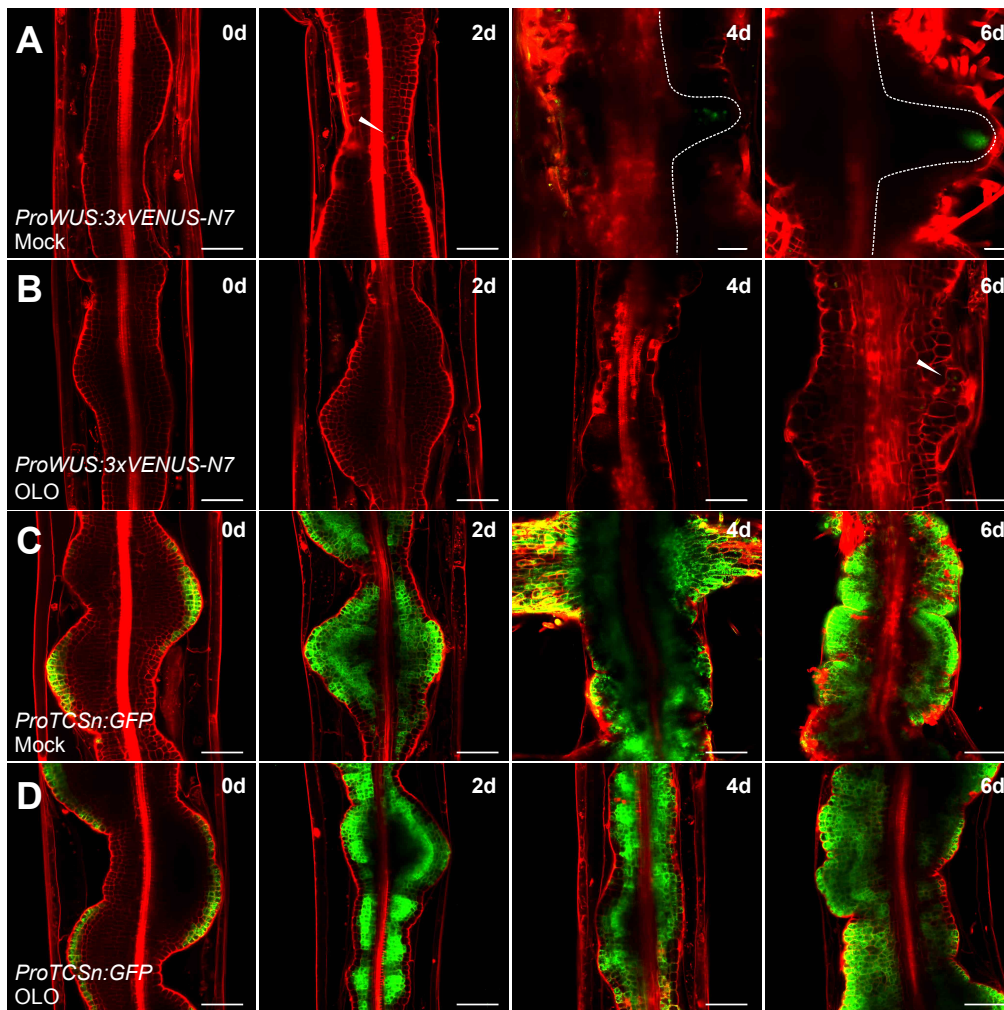

**Supplemental Figure 8. The Induction of *WUS* by Cytokinin is Delayed by OLO Treatment. (Supports Figure 3).**

(A) to (D) The *ProWUS:3xVENUS-N7* and *ProTCSn:GFP* explants were regenerated on SIM with (B) and (D) or without OLO (A) and (C). White arrows indicate *WUS*<sup>+</sup> cells. Cell outlines were stained by PI (red). Bar = 50 μm.

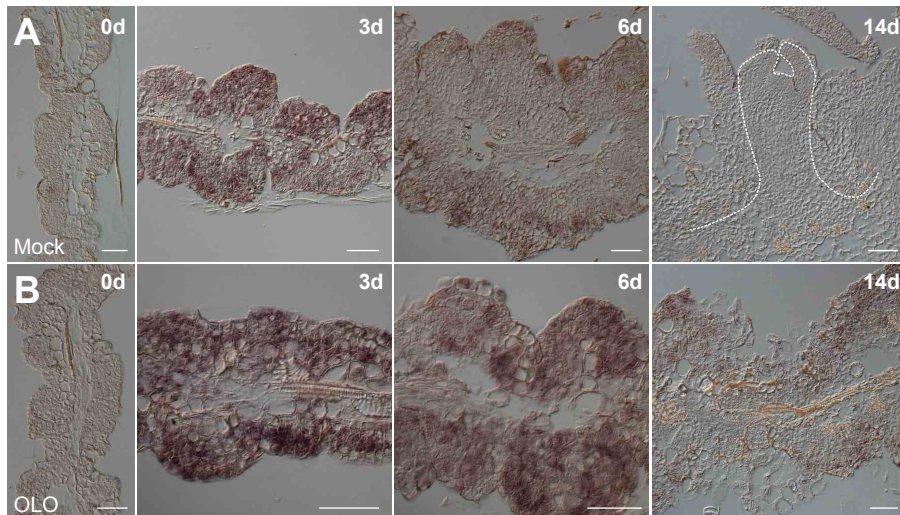

**Supplemental Figure 9. The Induction of *ARR5* by Cytokinin is not Delayed by OLO Treatment. (Supports Figure 3).**

(A) and (B) The expression of *ARR5*. The wild-type explants were regenerated on SIM with (B) or without OLO (A). The expression of *ARR5* was analyzed at day 0, 3, 6 and 14. Bar = 50  $\mu$ m.

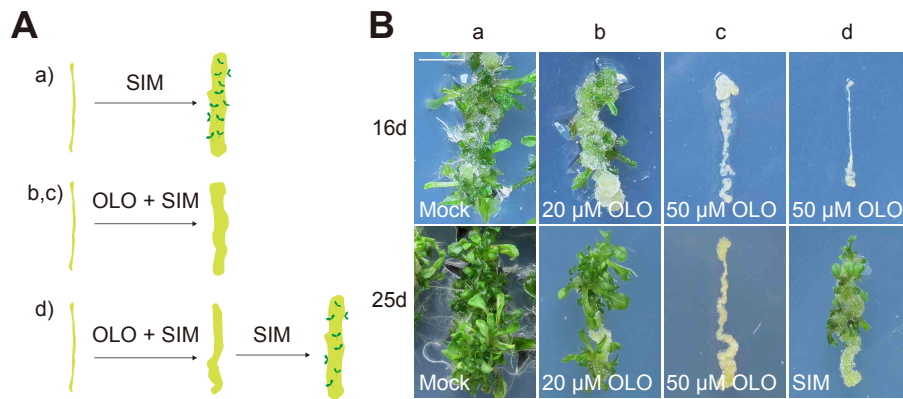

**Supplemental Figure 10. The Induction of Shoot Regeneration by Cytokinin is Delayed by OLO Treatment. (Supports Figure 3).**

**(A)** Set-up for the experiment to test the role of cell cycle in shoot regeneration. Four experiments (a-d) were designed.

**(B)** Shoot regeneration assays according to the experimental designs **(A)**. Bar = 0.5 cm.



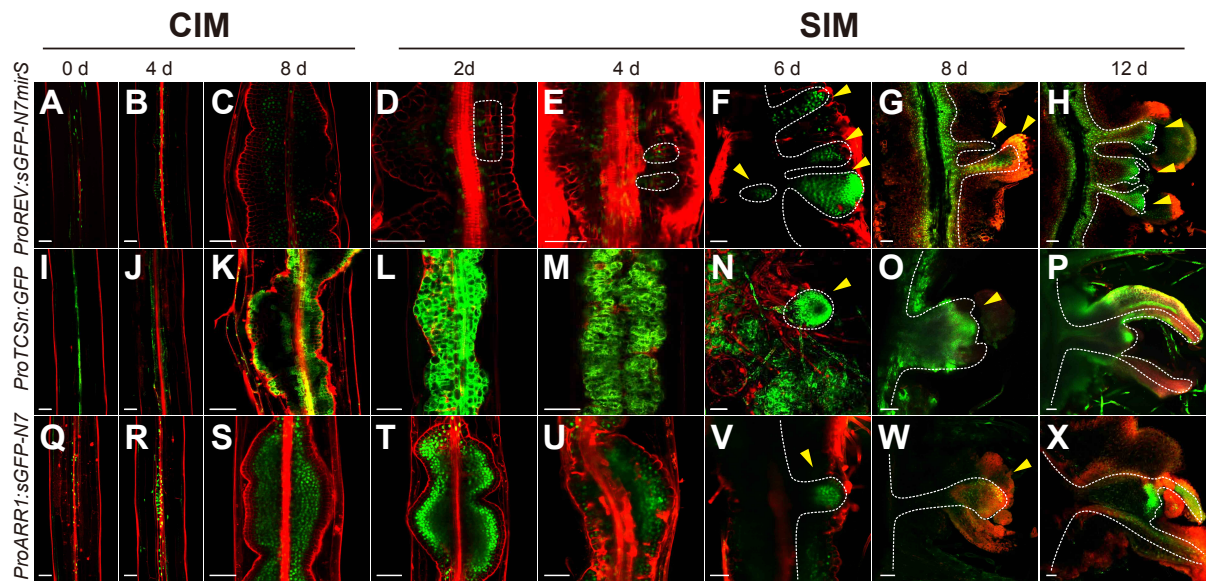

**Supplemental Figure 11. Dynamic Expression Patterns of *REV*, *TCS* and *ARR1* during Shoot Regeneration. (Supports Figures 2, 4 and 7).**

The hypocotyls from *ProREV:sGFP-N7mirS* (**A**) to (**H**), *ProTCSn:GFP* (**I**) to (**P**) and *ProARR1:sGFP-N7* (**Q**) to (**X**) were used for shoot regeneration. Yellow arrows indicate the developing SAM. Cell outlines were stained by propidium iodide (PI, red). Bar = 50  $\mu$ m.

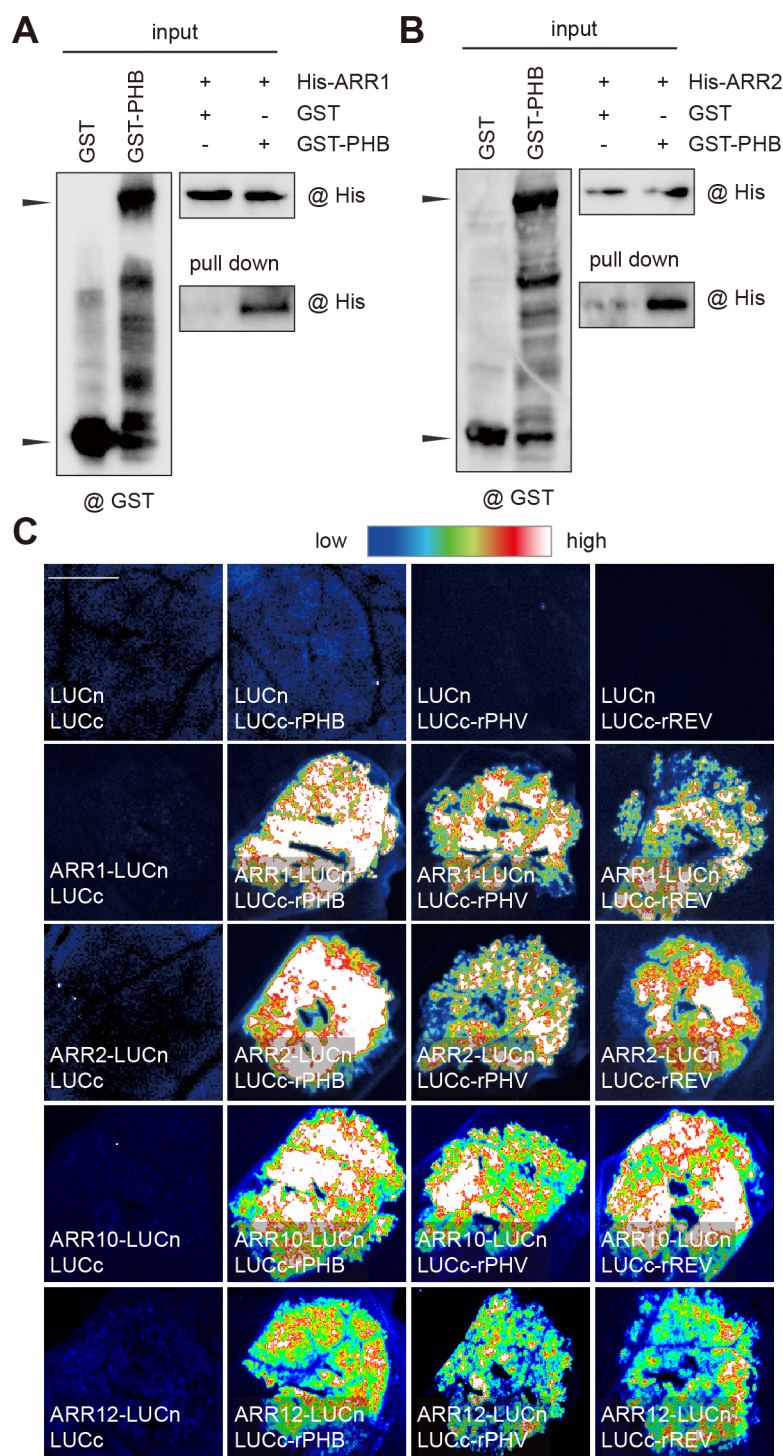

**Supplemental Figure 12. ARR1, ARR2, ARR10 and ARR12 Bind to HD-ZIP III Proteins. (Supports Figure 4).**

(A) and (B) *In vitro* pull-down assay. 6xHis-ARR1, 6xHis-ARR2 and GST-PHB were expressed in *E. coli*. Purified proteins were mixed and immunoprecipitated with glutathione sepharose 4B resins and blotted against anti-His or anti-GST antibody.

(C) BiLC assay in *N. benthamiana* leaves. ARR1, ARR2, ARR10 and ARR12 were fused to the amino-terminal domain of LUC (LUCn) and PHB/PHV/REV fused to the carboxyl-terminal domain of LUC (LUCc). Bar = 1.0 cm.

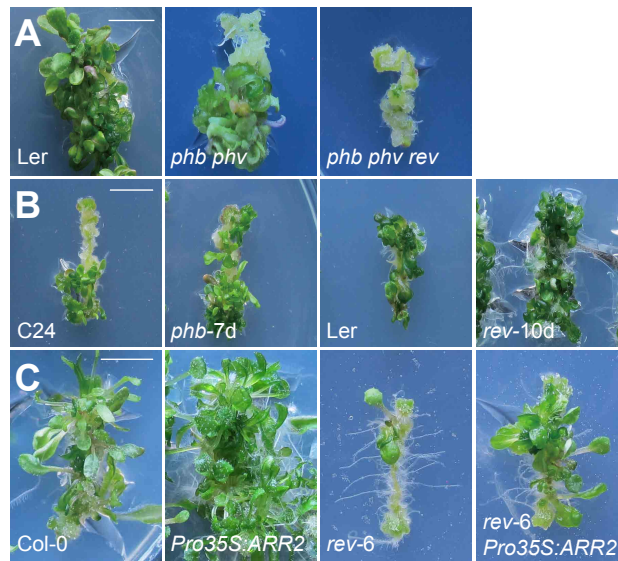

**Supplemental Figure 13. Shoot Regeneration Assay of *HD-ZIP III* Mutants. (Supports Figure 4).**  
**(A)** and **(B)** Shoot regeneration assay of *HD-ZIP III* mutants. Bar = 0.5 cm.  
**(C)** Shoot regeneration assay of Col-0, *Pro35S:ARR2*, *rev-6* and *Pro35S:ARR2 rev-6*. Bar = 0.5 cm.

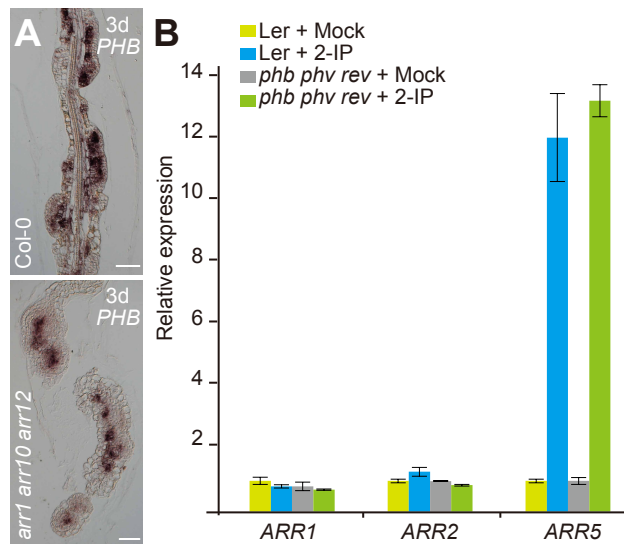

**Supplemental Figure 14. Expression of HD-ZIP III Transcription Factors and B-type ARRs. (Supports Figure 4).**

**(A)** Expression of *PHB* in the wild-type and *arr1 arr10 arr12* explants. The explants were cultured on SIM for 3 days. Bar = 50  $\mu$ m.

**(B)** Expression of A-type and B-type ARRs in wild type and *phb phv rev* explants. Expression was examined by qRT-PCR and normalized to that of *TUB*. Data are means  $\pm$  s.d..  $n=3$ .

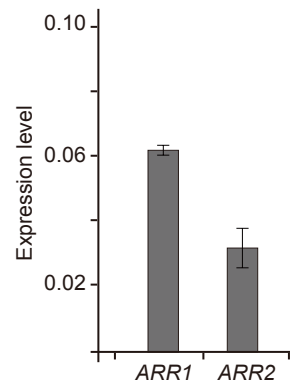

**Supplemental Figure 15. Expression of *ARR1* and *ARR2* in Wild-Type Explants. (Supports Figure 6).**

Expression was examined by qRT-PCR and normalized to that of *TUB*. Data are means  $\pm$  s.d..  $n=3$ .

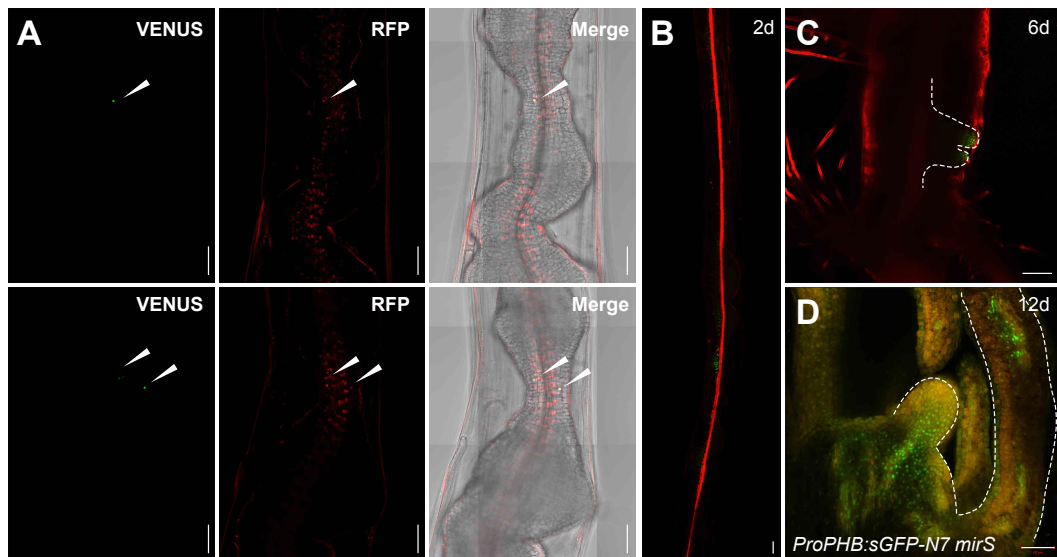

**Supplemental Figure 16. Spatial Activation of *WUS* by *REV* and *PHB*. (Supports Figure 7).**

**(A)** Expression of *ProREV:DsRED-N7 mirS ProWUS:3xVENUS-N7*. The explant was cultured on SIM for 2 days. The *WUS*<sup>+</sup> cell (green) is indicated by white arrows. Bar = 50 μm.

**(B) to (D)** Expression of *ProPHB:sGFP-N7 mirS* (green). The explants were culture on SIM for 2, 6 and 12 days. The expression domain of *PHB* is marked with dashed lines. Bar = 50 μm.



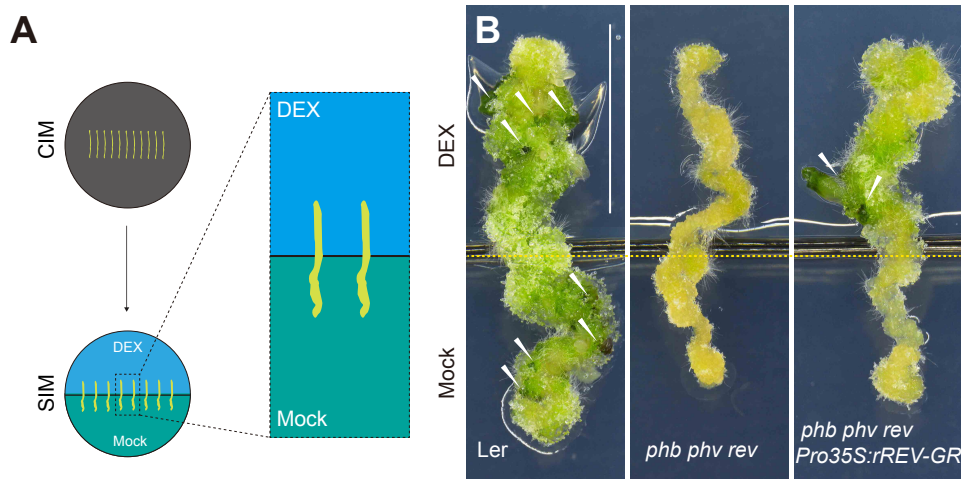

**Supplemental Figure 17. Local Induction of *HD-ZIP III* Promotes Shoot Regeneration on SIM. (Supports Figures 4 and 7).**

**(A)** and **(B)** Shoot regeneration assay of wild type (Ler), *phb phv rev* and *phb phv rev Pro35S:rREV-GR*. **(A)** Schematic diagram shows the experimental procedure for local induction of *HD-ZIP III*. A biplate (Thermo fisher, PB5220E) which allows two separate media formulations was used. **(B)** Explants of different genotypes were cultured on SIM with or without 10  $\mu$ M DEX for 10 days. White arrows indicate regenerated shoots. Bar = 0.5 cm.

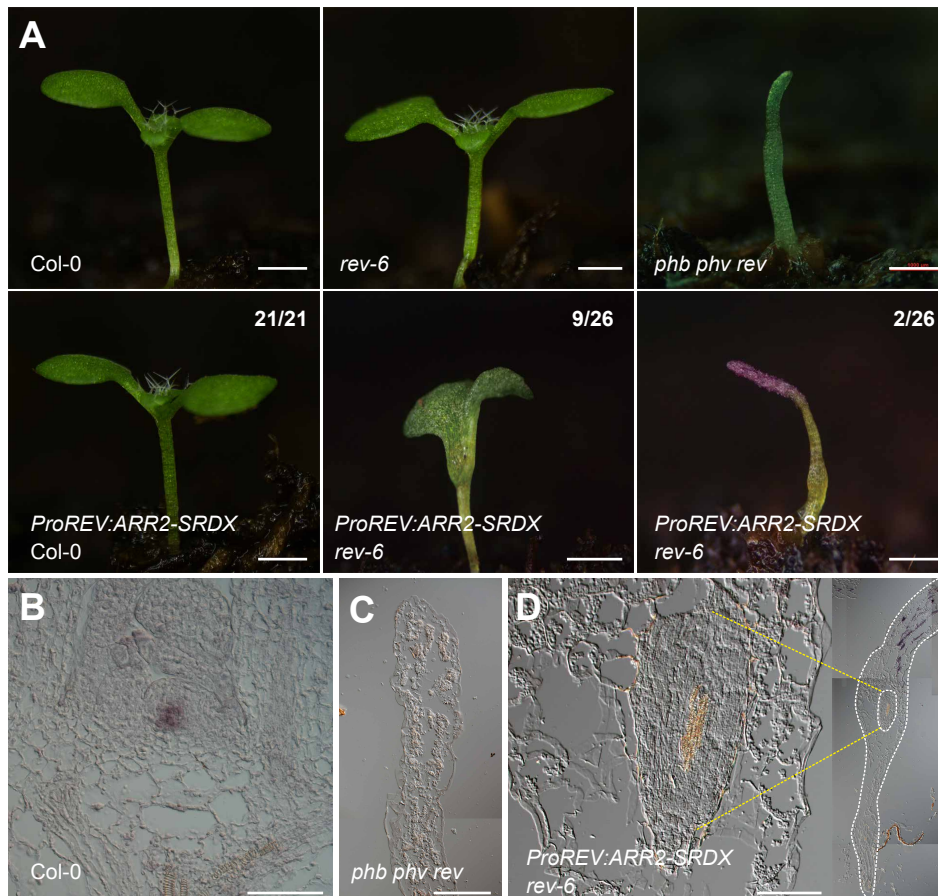

**Supplemental Figure 18. Genetic Interaction between *ARR2* and *REV* during Shoot Development. ( Supports Figures 4 and 7).**

**(A)** Phenotypes of wild type and mutants. Bar = 1 cm. The proportion of transgenic plants showing phenotype is shown.

**(B) to (D)** Expression of *WUS* in wild type and mutants. The *WUS* transcripts were detected by *in situ* hybridization assay. Bar = 50  $\mu$ m.

**Supplemental Table 1. Yeast Two-Hybrid Assay using ARR2 as Bait.**

| <b>Gene</b>             | <b>Interaction?</b> | <b>Biological Function</b>                                                                                                                                            |
|-------------------------|---------------------|-----------------------------------------------------------------------------------------------------------------------------------------------------------------------|
| <i>PHB</i> (At2g34710)  | Yes                 | HD-ZIP III transcription factor, defines adaxial leaf fates (Prigge et al., 2005)                                                                                     |
| <i>REV</i> (At5g60690)  | Yes                 | HD-ZIP III transcription factor, defines adaxial leaf fates (Prigge et al., 2005)                                                                                     |
| <i>PHV</i> (At1g30490)  | Yes                 | HD-ZIP III transcription factor, defines adaxial leaf fates (Prigge et al., 2005)                                                                                     |
| <i>CUC2</i> (At5g53950) | No                  | Transcription factor of the <i>NAC</i> gene family, required for the embryonic SAM (Daimon et al., 2003)                                                              |
| <i>CUC3</i> (At1g76420) | No                  | Transcription factor of the <i>NAC</i> gene family, required for embryonic apical meristem formation (Daimon et al., 2003; Vroemen et al., 2003; Hibara et al., 2006) |
| <i>TCP4</i> (At3g15030) | No                  | Target gene of miR319, regulate leaf differentiation (Efroni et al., 2013)                                                                                            |
| <i>ESR1</i> (At1g12980) | No                  | ERF/AP2 transcription factor, regulates shoot regeneration and meristem activity (Banno et al., 2001)                                                                 |
| <i>MP</i> (At1g19850)   | No                  | Auxin response factor, play roles in the development of shoot primordia (Zhao et al., 2010)                                                                           |
| <i>BRC1</i> (At3g18550) | No                  | TCP transcription factor, functions in axillary bud development (Aguilar-Martinez et al., 2007)                                                                       |
| <i>TFL2</i> (At5g17690) | No                  | TFL2 recognizes specifically H3K27me3 <i>in vivo</i> (Turck et al., 2007)                                                                                             |
| <i>LCR</i> (At1g27340)  | No                  | F-box protein, involved in the regulation of leaf morphology and meristem activity (Knauer et al., 2013)                                                              |

## SUPPLEMENTAL REFERENCES

- Aguilar-Martinez, J.A., Poza-Carrion, C., and Cubas, P.** (2007). Arabidopsis BRANCHED1 acts as an integrator of branching signals within axillary buds. *Plant Cell* **19**, 458-472.
- Banno, H., Ikeda, Y., Niu, Q.W., and Chua, N.H.** (2001). Overexpression of Arabidopsis ESR1 induces initiation of shoot regeneration. *Plant Cell* **13**, 2609-2618.
- Baurle, I., and Laux, T.** (2005). Regulation of *WUSCHEL* transcription in the stem cell niche of the Arabidopsis shoot meristem. *Plant Cell* **17**, 2271-2280.
- Daimon, Y., Takabe, K., and Tasaka, M.** (2003). The *CUP-SHAPED COTYLEDON* genes promote adventitious shoot formation on calli. *Plant Cell Physiol* **44**, 113-121.
- Efroni, I., Han, S.K., Kim, H.J., Wu, M.F., Steiner, E., Birnbaum, K.D., Hong, J.C., Eshed, Y., and Wagner, D.** (2013). Regulation of leaf maturation by chromatin-mediated modulation of cytokinin responses. *Dev Cell* **24**, 438-445.
- Gordon, S.P., Heisler, M.G., Reddy, G.V., Ohno, C., Das, P., and Meyerowitz, E.M.** (2007). Pattern formation during *de novo* assembly of the Arabidopsis shoot meristem. *Development* **134**, 3539-3548.
- Hibara, K., Karim, M.R., Takada, S., Taoka, K., Furutani, M., Aida, M., and Tasaka, M.** (2006). Arabidopsis *CUP-SHAPED COTYLEDON3* regulates postembryonic shoot meristem and organ boundary formation. *Plant Cell* **18**, 2946-2957.
- Knauer, S., Holt, A.L., Rubio-Somoza, I., Tucker, E.J., Hinze, A., Pisch, M., Javelle, M., Timmermans, M.C., Tucker, M.R., and Laux, T.** (2013). A protodermal miR394 signal defines a region of stem cell competence in the Arabidopsis shoot meristem. *Dev Cell* **24**, 125-132.
- Mason, M.G., Mathews, D.E., Argyros, D.A., Maxwell, B.B., Kieber, J.J., Alonso, J.M., Ecker, J.R., and Schaller, G.E.** (2005). Multiple type-B response regulators mediate cytokinin signal transduction in Arabidopsis. *Plant Cell* **17**, 3007-3018.
- Prigge, M.J., Otsuga, D., Alonso, J.M., Ecker, J.R., Drews, G.N., and Clark, S.E.** (2005). Class III homeodomain-leucine zipper gene family members have overlapping, antagonistic, and distinct roles in Arabidopsis development. *Plant Cell* **17**, 61-76.
- Turck, F., Roudier, F., Farrona, S., Martin-Magniette, M.L., Guillaume, E., Buisine, N., Gagnot, S., Martienssen, R.A., Coupland, G., and Colot, V.** (2007). Arabidopsis TFL2/LHP1 specifically associates with genes marked by trimethylation of histone H3 lysine 27. *PLoS Genet* **3**, e86.
- Vroemen, C.W., Mordhorst, A.P., Albrecht, C., Kwaaitaal, M.A., and de Vries, S.C.** (2003). The *CUP-SHAPED COTYLEDON3* gene is required for boundary and shoot meristem formation in Arabidopsis. *Plant Cell* **15**, 1563-1577.
- Zhao, Z., Andersen, S.U., Ljung, K., Dolezal, K., Miotk, A., Schultheiss, S.J., and Lohmann, J.U.** (2010). Hormonal control of the shoot stem-cell niche. *Nature* **465**, 1089-1092.
